# Supplementary material
Source: publisher figshare collection journal article supplement (https://acs.figshare.com/ndownloader/files/31066126)
Supplement: Supplementary file 1 [file 31066126]

## Supporting Information

# Cobalt Phosphate Nanocrystals: A Catalase-Like Nanozyme and in Situ Enzyme Encapsulating Carrier for Efficient Chemoenzymatic Synthesis of $\alpha$ -Keto Acid

*Zhenfu Wang,<sup>1</sup> Yang Liu,<sup>3</sup> Xiaoyan Dong,<sup>1,2</sup> Yan Sun<sup>\*,1,2</sup>*

<sup>1</sup> Department of Biochemical Engineering, School of Chemical Engineering and Technology,  
Tianjin University, Tianjin 300350, China.

<sup>2</sup> Key Laboratory of Systems Bioengineering and Frontiers Science Center for Synthetic Biology  
(Ministry of Education), Tianjin University, Tianjin 300350, China.

<sup>3</sup> Department of Biology & Guangdong Provincial Key Laboratory of Marine Biotechnology,  
Institute of Marine Sciences, College of Science, Shantou University, Shantou, Guangdong  
515063, P.R. China.

\*E-mail: ysun@tju.edu.cn.

Table of contents:

1. Supplementary Tables (Table S1)

2. Supplementary Figures (Figures S1-S8)

**Table S1.** Performance comparison of different cascade catalysis systems for  $\alpha$ -keto acids synthesis.

| Catalyst                                                      | Catalyst preparation                                                  | Substrate<br>concentration | Conversion yield                   | TOF based<br>on AAO <sup>a</sup> | Reference |
|---------------------------------------------------------------|-----------------------------------------------------------------------|----------------------------|------------------------------------|----------------------------------|-----------|
| DAAO from <i>Trigonopsis<br/>variabilis</i> and bovine<br>CAT | DAAO immobilization on<br>functionalized silica bead,<br><br>free CAT | 50 mM<br><br>alanine       | 90.0% pyruvate                     | 0.79 min <sup>-1</sup>           | [38]      |
| DAAO from <i>Trigonopsis<br/>variabilis</i> and bovine<br>CAT | Coimmobilization on<br>functionalized agarose bead                    | 20 mM<br><br>phenylalanine | 98.0%<br><br>phenylpyruvic<br>acid | 2.86 min <sup>-1</sup>           | [39]      |
| LAAO from <i>Crotalus<br/>adamanteus</i> and Pt               | Immobilization on Pt@UiO-66                                           | 0.5 mM L-Trp               | 99.7% IPA                          | 19.25 min <sup>-1</sup>          | [19]      |

LAAO from *Crotalus*

In situ encapsulation of LAAO in

*adamanteus* and CoPs

CoPs

0.5 mM L-Trp

100.0% IPA

16.33 min<sup>-1</sup>

This work

---

<sup>a</sup> TOF based on AAO is expressed as molecules of  $\alpha$ -keto acid produced per minute per molecule of AAO.

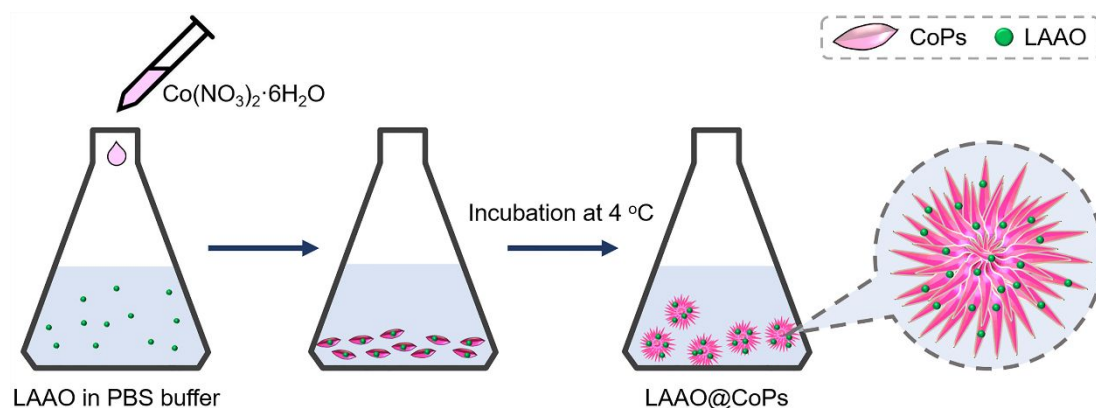

**Figure S1.** Schematic illustration of the preparation of LAAO@CoPs. Preparation conditions: 0.2 mg/mL LAAO, 10 mM  $\text{Co}(\text{NO}_3)_2 \cdot 6\text{H}_2\text{O}$ , 10 mM phosphate buffer (pH 8.5), 4 °C, 24 h.

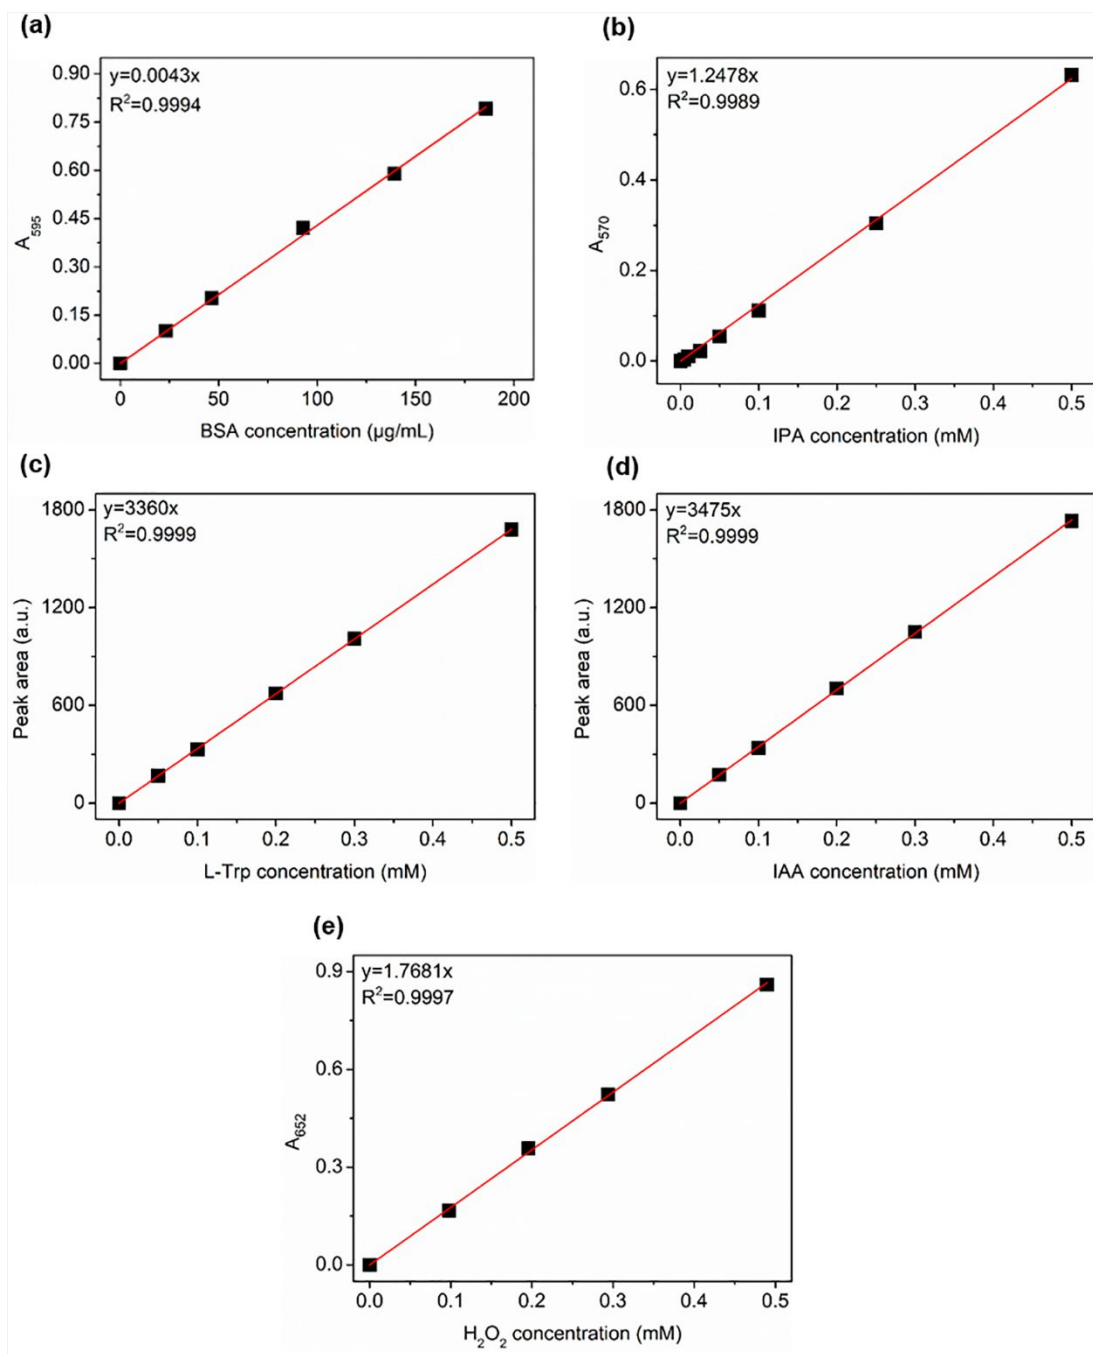

**Figure S2.** (a) Calibration curve of bovine serum albumin measured by Bradford method, the wavelength for the spectrophotometry measurement was 595 nm; (b) Calibration curve of IPA, the wavelength for the spectrophotometry measurement of IPA was 570 nm; (c) Calibration curve of L-Trp; (d) Calibration curve of IAA; (e) Calibration curve of  $\text{H}_2\text{O}_2$ . The wavelength for the HPLC

detection of L-Trp and IAA was 280 nm. The wavelength for the spectrophotometry measurement of  $\text{H}_2\text{O}_2$  was 652 nm.

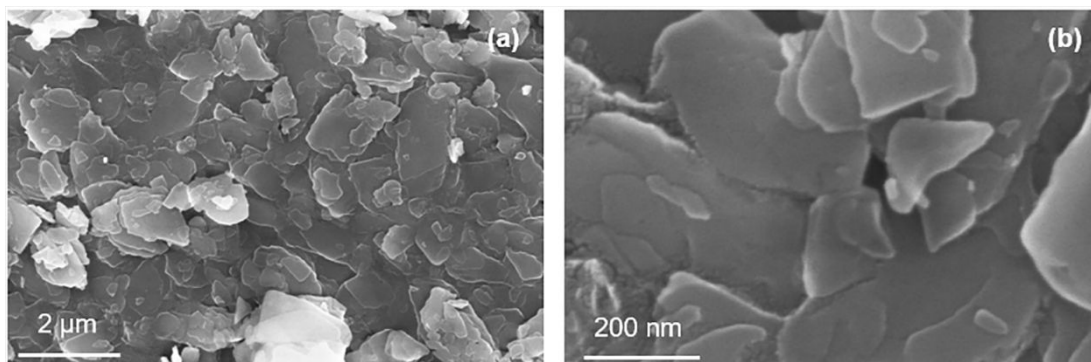

**Figure S3.** SEM images of CoPs at two amplifications, (a) 2  $\mu\text{m}$ , (b) 200 nm.

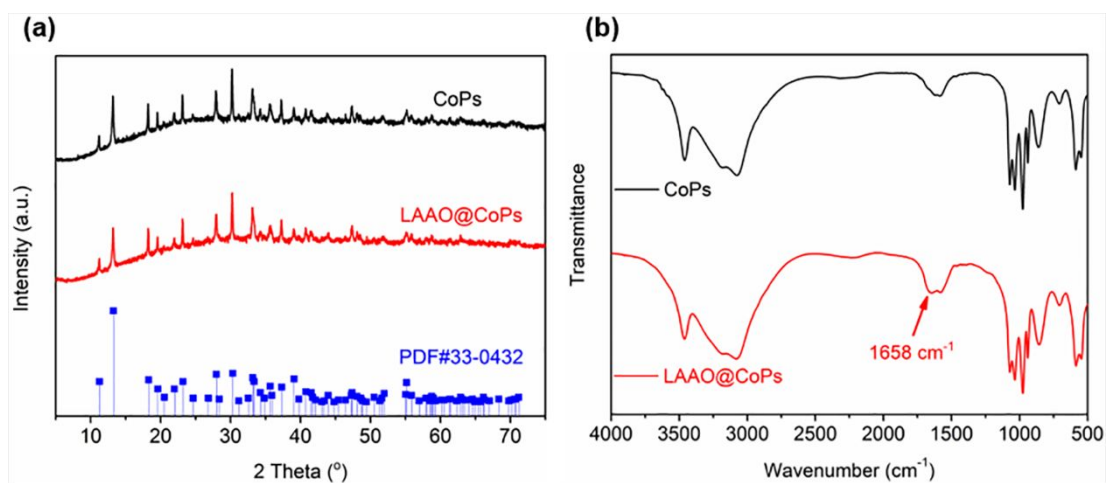

**Figure S4.** (a) XRD patterns and (b) FTIR spectra of CoPs and LAAO@CoPs.

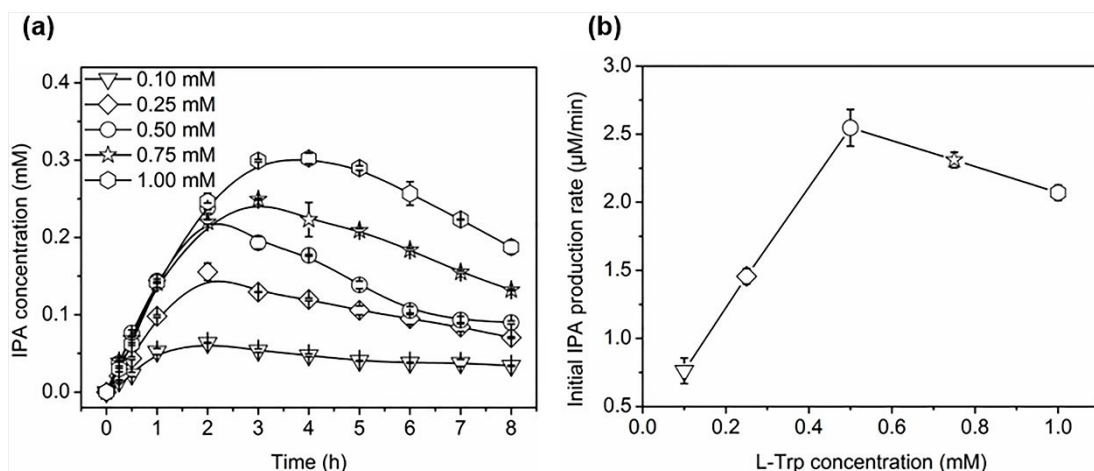

**Figure S5.** (a) Time course of IPA concentration in the reactions catalyzed by LAAO at different initial L-Trp concentrations; (b) Initial IPA production rate catalyzed by LAAO as a function of L-Trp concentration. Reaction condition: 0.01 mg/mL LAAO, 50 mM HEPES buffer (pH 8.0), 25 °C. Error bars represent standard deviations from triplicate experiments.

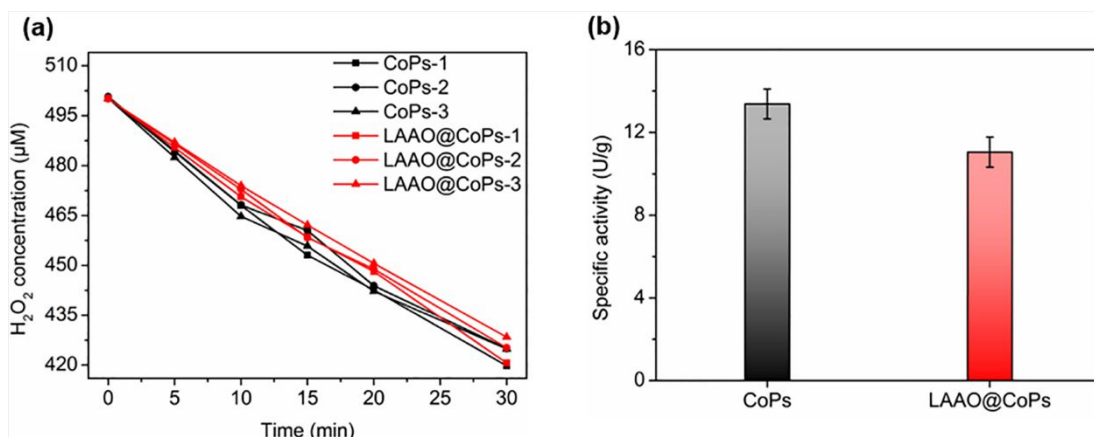

**Figure S6.** (a)  $\text{H}_2\text{O}_2$  decomposition performance of CoPs and LAAO@CoPs; (b) Specific activities of CoPs and LAAO@CoPs for  $\text{H}_2\text{O}_2$  decomposition. Reaction condition: 0.5 mM  $\text{H}_2\text{O}_2$ , 0.25 mg/mL CoPs or LAAO@CoPs, 50 mM HEPES buffer (pH 8.0), 25 °C. Error bars represent standard deviations from triplicate experiments.

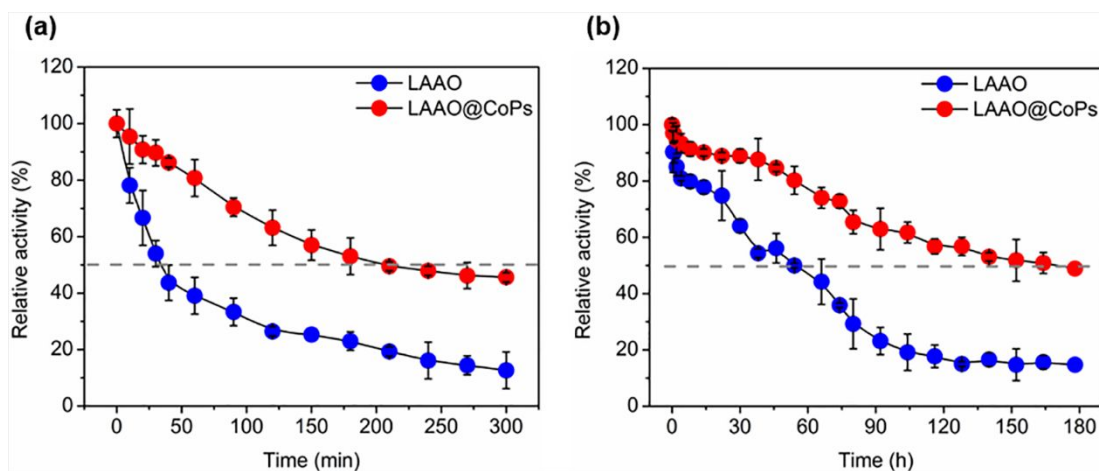

**Figure S7.** (a) Thermal stability of LAAO and LAAO@CoPs at 40 °C; (b) Storage stability of LAAO and LAAO@CoPs at 25 °C. Reaction condition: 0.5 mM L-Trp, 0.01 mg/mL LAAO or 0.25 mg/mL LAAO@CoPs (0.01 mg/mL LAAO), 50 mM HEPES buffer (pH 8.0), 25 °C. Error bars represent standard deviations from triplicate experiments.

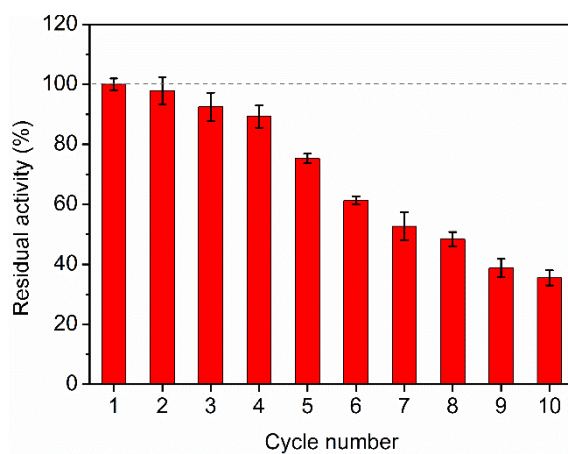

**Figure S8.** Reusability of LAAO@CoPs. Reaction condition: 0.5 mM L-Trp, 0.25 mg/mL LAAO@CoPs (0.01 mg/mL LAAO), 50 mM HEPES buffer (pH 8.0), 25 °C. Error bars represent standard deviations from triplicate experiments.
